# Supplementary material
Source: PubMed Central journal article supplement (PMC4536117)
Supplement: NIHMS693063-supplement-1.pdf [file NIHMS693063-supplement-1.pdf]

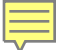

# Choice Contrasts

1

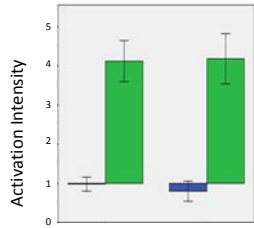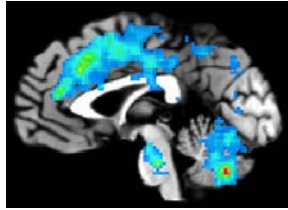

2

(PM)

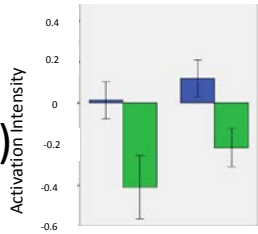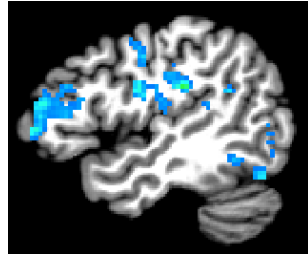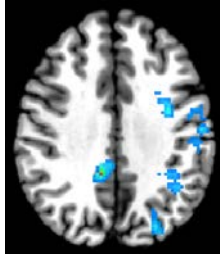

HC HR

- Choose Win
- Choose Inflate

# Outcome Contrasts

1

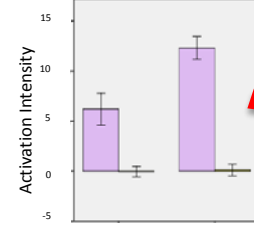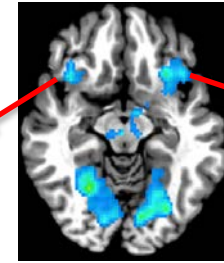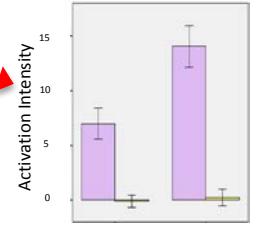

HC HR

2

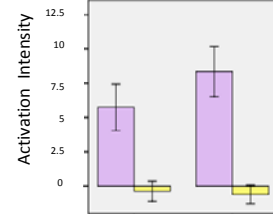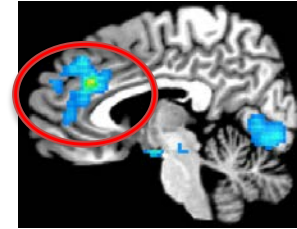

3

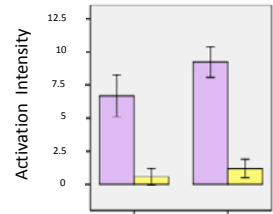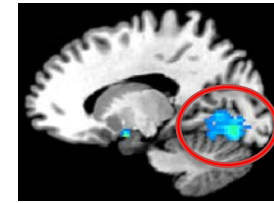

4

(PM)

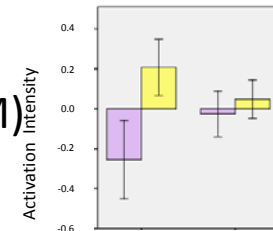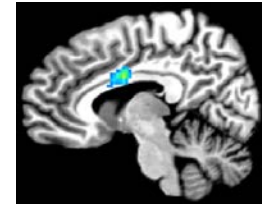

HC HR

- Outcome Inflate
- Outcome Explode

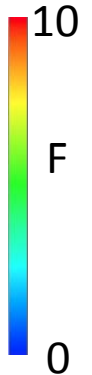

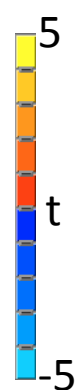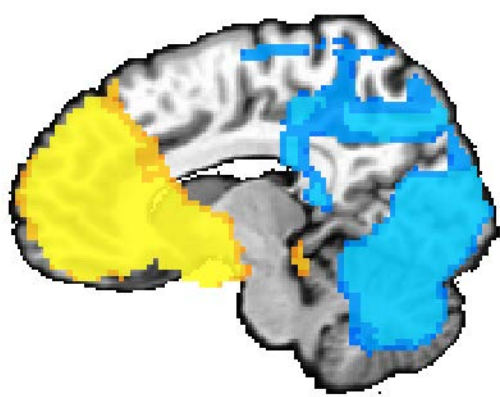

Healthy comparison

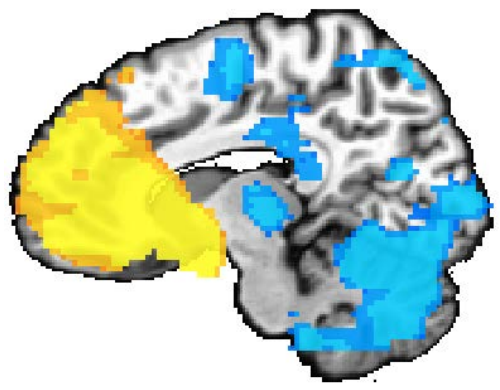

High risk

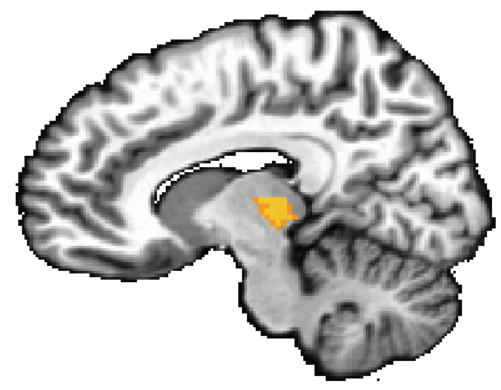

HC - HR
